# Supplementary material for: Influence of the Composition and Testing Modes on the Electrochemical Performance of Li-Rich Cathode Materials
Source: MDPI journal article supplement (doi:10.3390/nano12224054), 2022-11-17
Supplement: s1 [file s1]

## Supplementary

# Influence of the Composition and Testing Modes on the Electrochemical Performance of Li-Rich Cathode Materials

Lidia Pechen <sup>1,\*</sup>, Elena Makhonina <sup>1</sup>, Anna Medvedeva <sup>1</sup>, Yury Politov <sup>1</sup>, Aleksander Rumyantsev <sup>2</sup>, Yury Koshtyal <sup>2</sup>, Alexander Goloveshkin <sup>3</sup>, and Igor Eremenko <sup>1,\*</sup>

<sup>1</sup> Kurnakov Institute of General and Inorganic Chemistry of Russian Academy of Sciences, 31 Leninsky pr., 119991 Moscow, Russia

<sup>2</sup> Ioffe Institute of Russian Academy of Sciences, 26 Politekhnicheskaya ul., 194021 St Petersburg, Russia

<sup>3</sup> A.N. Nesmeyanov Institute of Organoelement Compounds of Russian Academy of Sciences, 28 Vavilova ul., 119334 Moscow, Russia

\* Correspondence: lidia.s.maslennikova@gmail.com; Tel.: +74957756585 (ext. 2-41)

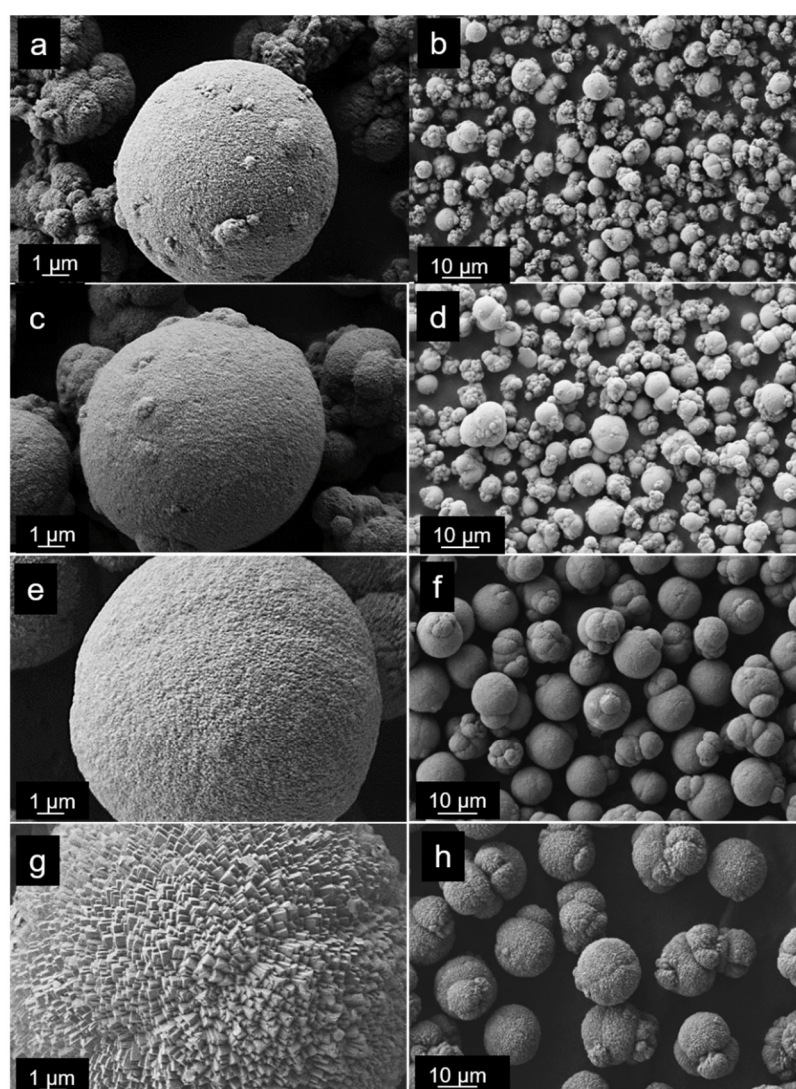

Figure S1. SEM images of the carbonate precursors for cathode materials with different magnifications: (a, b) LMR20, (c, d) LMR35, (e, f) LMR50, and (g, h) LMR65.

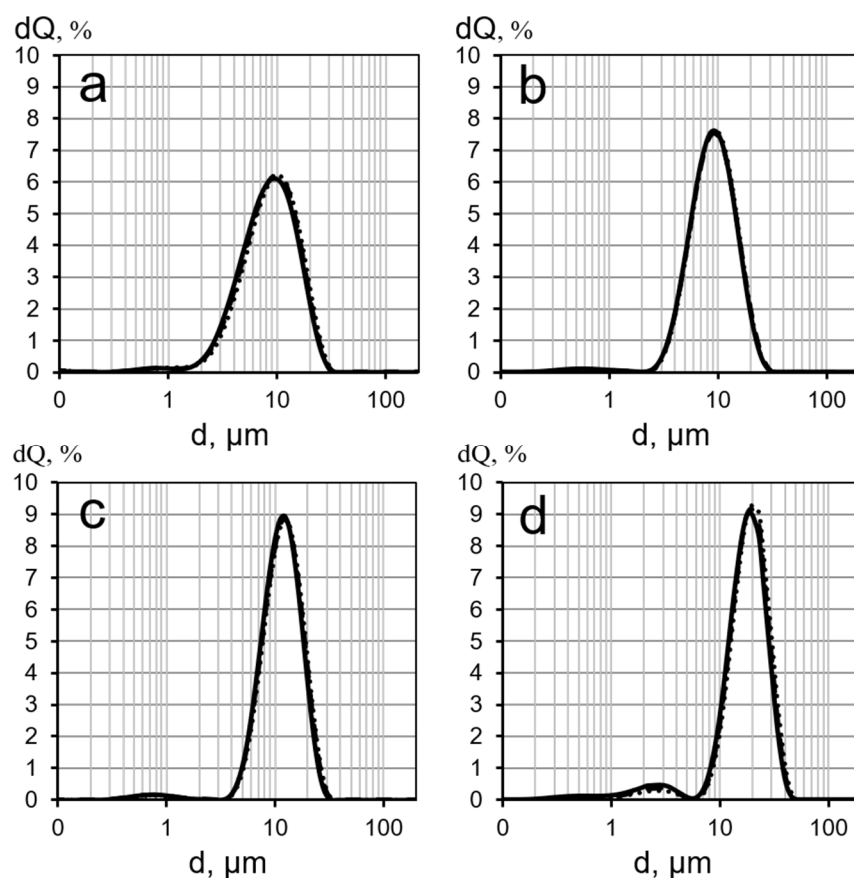

Figure S2. Differential agglomerate distributions for cathode materials with different compositions: (a) LMR20, (b) LMR35, (c) LMR50, and (d) LMR65.

Table S1. Cathode material compositions determined by ICP-OES

| Samples | Determined composition                                                           |
|---------|----------------------------------------------------------------------------------|
| LMR20   | $\text{Li}_{1.109}\text{Ni}_{0.244}\text{Mn}_{0.424}\text{Co}_{0.242}\text{O}_2$ |
| LMR35   | $\text{Li}_{1.147}\text{Ni}_{0.184}\text{Mn}_{0.483}\text{Co}_{0.185}\text{O}_2$ |
| LMR50   | $\text{Li}_{1.210}\text{Ni}_{0.133}\text{Mn}_{0.535}\text{Co}_{0.135}\text{O}_2$ |
| LMR65   | $\text{Li}_{1.249}\text{Ni}_{0.088}\text{Mn}_{0.579}\text{Co}_{0.087}\text{O}_2$ |

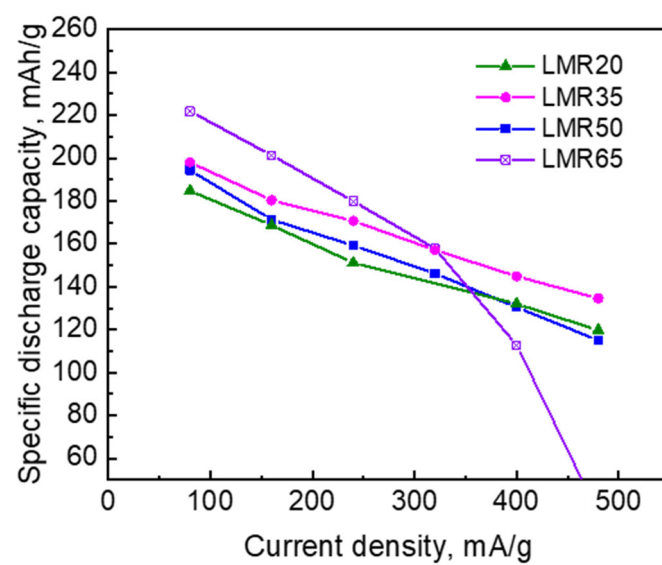

Figure S3. Rate capabilities of the cathode materials.
